# Supplementary material
Source: Springer Nature journal article supplement (https://www.springermedizin.de/resource/supplementary/12887_2013_1032_MOESM3_ESM.pdf/9476968)
Supplement: MOESM3 [file 9476968]

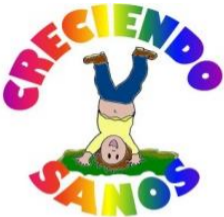

## Growing Up Healthy

- 5 daily servings of fruits and vegetables
- Age-appropriate portion sizes
- Fewer sugary drinks, e.g. soda, flavored milk and juice
- Less fast food and processed snacks
- <2 hours/day of screen time
- $\geq$  1 hour/day of physical activity/ active play
